# Supplementary material for: Intra-articular hyaluronic acid in knee osteoarthritis: clinical data for a product family (ARTHRUM), with comparative meta-analyses
Source: PubMed Central journal article supplement — Curr Ther Res Clin Exp. 2021 Sep 20;95:100637. doi: 10.1016/j.curtheres.2021.100637 (PMC8529397; doi:10.1016/j.curtheres.2021.100637), 2021-09-20
Supplement: mmc1.pdf [file mmc1.pdf]

| Ref | Main author    | Year of publication | Study design    | Analyzed population | Arm studied product / control                           | Profiled population  |                     | Age                  |                              |                          |                      | Anteriority of knee OA (years) |                      |                      |                      | Lower limb surgical history |                      | BMI                          |                          |                      |                      | Radiological grade   |                      |                      |                      |                |        |
|-----|----------------|---------------------|-----------------|---------------------|---------------------------------------------------------|----------------------|---------------------|----------------------|------------------------------|--------------------------|----------------------|--------------------------------|----------------------|----------------------|----------------------|-----------------------------|----------------------|------------------------------|--------------------------|----------------------|----------------------|----------------------|----------------------|----------------------|----------------------|----------------|--------|
|     |                |                     |                 |                     |                                                         | per group            | Women               | Men                  | mean                         | SD                       | mini                 | maxi                           | mean                 | SD                   | mini                 | maxi                        | declared             | %                            | mean                     | SD                   | mini                 | maxi                 | KL I                 | KL II                | KL III               | KL IV          |        |
| 13  | Pettersson     | 2019                | RCT             | 369                 | Monovisc IA Placebo                                     | 184<br>185           | 109<br>106          | 75<br>79             | 59,5<br>58,7                 | 8,0<br>9,2               | 35<br>35             | 75<br>75                       | NR<br>NR             | NR<br>NR             | NR<br>NR             | NR<br>NR                    | NR<br>NR             | NR<br>NR                     | 29,9<br>30,4             | 4,3<br>4,6           | NR<br>NR             | NR<br>NR             | 0<br>0               | 105<br>97            | 79<br>88             | 0<br>0         |        |
| 14  | Maheu          | 2019                | RCT             | 292                 | Ostenil Plus Synvisc-One                                | 144<br>148           | 104<br>90           | 40<br>58             | 67,1<br>66,6                 | 9,7<br>10,7              | 40<br>40             | 85<br>85                       | 6,9<br>7,4           | 5,3<br>5,3           | NR<br>NR             | NR<br>NR                    | NR<br>NR             | NR<br>NR                     | 26,4<br>26,3             | 3,0<br>2,9           | NR<br>NR             | NR<br>NR             | 21<br>26             | 78<br>87             | 45<br>35             | 0<br>0         |        |
| 15  | Diraçoğlu      | 2016                | RCT             | 40                  | Monovisc Adant                                          | 20<br>20             | 16<br>17            | 4<br>3               | 58,0<br>56,4                 | 7,0<br>5,7               | 45<br>45             | 70<br>70                       | NR<br>NR             | NR<br>NR             | NR<br>NR             | NR<br>NR                    | NR<br>NR             | NR<br>NR                     | 30,5<br>30,8             | 4,9<br>3,3           | NR<br>NR             | NR<br>NR             | 0<br>0               | NR<br>NR             | NR<br>NR             | 0<br>0         |        |
| 16  | Saccomanno     | 2016                | RCT             | 157                 | Orthovisc Exercise (EBR) Orthovisc + EBR                | 53<br>51<br>53       | 42<br>33<br>38      | 11<br>18<br>15       | 62,8<br>61,2<br>61,4         | 13,2<br>10,1<br>9,7      | NR<br>NR<br>NR       | NR<br>NR<br>NR                 | NR<br>NR<br>NR       | NR<br>NR<br>NR       | NR<br>NR<br>NR       | NR<br>NR<br>NR              | 10<br>6<br>13        | 18,9%<br>11,8%<br>24,5%      | 27,5<br>27,5<br>28,9     | 3,0<br>3,6<br>3,9    | NR<br>NR<br>NR       | NR<br>NR<br>NR       | 34<br>35<br>35       | 8<br>12<br>12        | 11<br>4<br>6         | 0<br>0<br>0    |        |
| 17  | Tammachote     | 2016                | RCT             | 99                  | Synvisc-One Triamcinolone                               | 50<br>49             | 43<br>36            | 7<br>13              | 62,6<br>61,0                 | NR<br>NR                 | 46<br>47             | 77<br>81                       | NR<br>NR             | NR<br>NR             | NR<br>NR             | NR<br>NR                    | NR<br>NR             | NR<br>NR                     | 26,3<br>25,8             | NR<br>NR             | NR<br>NR             | NR<br>NR             | 10<br>12             | 11<br>11             | 22<br>19             | 7<br>7         |        |
| 18  | Van der Weegen | 2015                | RCT             | 196                 | Fermatron Plus Placebo I/A                              | 99<br>97             | 50<br>47            | 49<br>50             | 58,7<br>60,1                 | 9,6<br>10,1              | NR<br>NR             | NR<br>NR                       | 5,3<br>5,6           | 7,5<br>7,6           | NR<br>NR             | NR<br>NR                    | NR<br>NR             | NR<br>NR                     | 28,6<br>29,3             | 5,2<br>4,7           | NR<br>NR             | NR<br>NR             | 32<br>27             | 53<br>51             | 14<br>19             | 0<br>0         |        |
| 19  | Davalillo      | 2015                | RCT             | 195                 | Suprahyl Betamethasone                                  | 97<br>98             | 59<br>57            | 38<br>41             | 62,7<br>62,8                 | 0,6<br>0,6               | 40<br>40             | 85<br>85                       | NR<br>NR             | NR<br>NR             | NR<br>NR             | NR<br>NR                    | NR<br>NR             | NR<br>NR                     | 28,3<br>26,3             | 0,5<br>0,4           | NR<br>NR             | NR<br>NR             | 0<br>0               | 62<br>65             | 35<br>33             | 0<br>0         |        |
| 20  | Zhang          | 2015                | RCT             | 319                 | Artz Durolane                                           | 158<br>161           | 127<br>119          | 31<br>42             | 60,4<br>60,2                 | 7,8<br>8,1               | 42<br>40             | 78<br>78                       | 4,0<br>3,9           | 4,8<br>5,3           | NR<br>NR             | NR<br>NR                    | NR<br>NR             | 8<br>4                       | 5,1%<br>2,5%             | NR<br>NR             | NR<br>NR             | NR<br>NR             | NR<br>NR             | 0<br>0               | 95<br>94             | 63<br>67       | 0<br>0 |
| 21  | Leighton       | 2014                | RCT             | 433                 | Durolane Methylprednisolone                             | 218<br>215           | 111<br>102          | 107<br>113           | 61,9<br>61,5                 | 9,6<br>9,9               | 35<br>35             | 80<br>80                       | 4,7<br>4,9           | 5,4<br>6,3           | NR<br>NR             | NR<br>NR                    | NR<br>NR             | 74<br>63                     | 33,9%<br>29,3%           | 28,2<br>28,3         | 4,2<br>4,1           | NR<br>NR             | NR<br>NR             | 0<br>0               | 71<br>85             | 147<br>130     | 0<br>0 |
| 22  | Arden          | 2014                | RCT             | 218                 | Durolane Placebo I/A                                    | 108<br>110           | 59<br>51            | 49<br>59             | 64,5<br>60,9                 | NR<br>NR                 | 29<br>30             | 84<br>86                       | 2,2<br>3,1           | NR<br>NR             | 0,0<br>0,0           | 21,2<br>44,1                | 46<br>45             | 42,6%<br>40,9%               | 27,2<br>27,5             | NR<br>NR             | 20,3<br>20,1         | 39,7<br>41           | 0<br>0               | 33<br>40             | 75<br>70             | 0<br>0         |        |
| 23  | Berenbaum      | 2012                | RCT             | 426                 | Go-On Hyalgan                                           | 217<br>209           | 135<br>134          | 82<br>75             | 67,2<br>66,1                 | 7,8<br>8,1               | 50<br>50             | 80<br>80                       | NR<br>NR             | NR<br>NR             | NR<br>NR             | NR<br>NR                    | NR<br>NR             | NR<br>NR                     | 28,0<br>27,7             | 3,0<br>3,1           | NR<br>NR             | NR<br>NR             | 0<br>0               | 101<br>113           | 116<br>96            | 0<br>0         |        |
| 24  | Strand         | 2012                | RCT             | 375                 | Gel-200 Placebo I/A                                     | 247<br>128           | 147<br>77           | 100<br>51            | 60,9<br>60,3                 | 10,2<br>10,0             | 40<br>40             | 80<br>80                       | 3,5<br>2,6           | 4,3<br>3,4           | NR<br>NR             | NR<br>NR                    | NR<br>NR             | NR<br>NR                     | 28,3<br>28,7             | 4,1<br>3,8           | NR<br>NR             | NR<br>NR             | 21<br>18             | 94<br>47             | 132<br>63            | 0<br>0         |        |
| 25  | DeCaria        | 2012                | RCT             | 30                  | Hyalgan Placebo I/A                                     | 15<br>15             | 7<br>7              | 8<br>8               | 71,9<br>72,9                 | 6,8<br>5,5               | NR<br>NR             | NR<br>NR                       | NR<br>NR             | NR<br>NR             | NR<br>NR             | NR<br>NR                    | NR<br>NR             | NR<br>NR                     | 30,5<br>29,4             | 6,2<br>4,1           | NR<br>NR             | NR<br>NR             | 0<br>0               | NR<br>NR             | NR<br>NR             | 0<br>0         |        |
| 26  | Kawasaki       | 2009                | RCT             | 87                  | Artz Exercise                                           | 42<br>45             | 42<br>45            | 0<br>0               | 69,5<br>71,2                 | 8,4<br>7,1               | NR<br>NR             | NR<br>NR                       | NR<br>NR             | NR<br>NR             | NR<br>NR             | NR<br>NR                    | NR<br>NR             | NR<br>NR                     | 25,7<br>24,6             | 4,1<br>3,0           | NR<br>NR             | NR<br>NR             | NR<br>NR             | NR<br>NR             | NR<br>NR             | NR<br>NR       |        |
| 27  | Pavelka        | 2011                | RCT             | 380                 | Sinovial Synvisc                                        | 192<br>188           | 139<br>138          | 53<br>50             | 65,1<br>64,9                 | 9,1<br>8,7               | 40<br>40             | 81<br>81                       | 6,3<br>5,6           | 5,8<br>5,6           | NR<br>NR             | NR<br>NR                    | NR<br>NR             | 24<br>25                     | 12,5%<br>13,3%           | 27,1<br>27,0         | 3,1<br>3,1           | NR<br>NR             | NR<br>NR             | 0<br>0               | 85<br>85             | 107<br>103     | 0<br>0 |
| 28  | Huang          | 2011                | RCT             | 200                 | Hyalgan Placebo I/A                                     | 100<br>100           | 74<br>78            | 26<br>22             | 65,9<br>64,2                 | 8,1<br>8,4               | 50<br>50             | NR<br>NR                       | 1,4<br>1,0           | 3,3<br>2,2           | NR<br>NR             | NR<br>NR                    | NR<br>NR             | NR<br>NR                     | 25,7<br>25,4             | 4,3<br>2,9           | NR<br>NR             | NR<br>NR             | 0<br>0               | 59<br>60             | 41<br>40             | 0<br>0         |        |
| 29  | Diraçoğlu      | 2009                | RCT             | 60                  | Synvisc Placebo I/A                                     | 40<br>20             | 36<br>20            | 4<br>0               | 59,4<br>56,2                 | 9,9<br>7,2               | NR<br>NR             | NR<br>NR                       | NR<br>NR             | NR<br>NR             | NR<br>NR             | NR<br>NR                    | NR<br>NR             | NR<br>NR                     | 31,1<br>31,3             | 5,0<br>4,0           | NR<br>NR             | NR<br>NR             | 0<br>0               | NR<br>NR             | NR<br>NR             | 0<br>0         |        |
| 30  | Onel           | 2008                | RCT             | 321                 | Synvisc Euflexxa                                        | 161<br>160           | 108<br>99           | 53<br>61             | 63,7<br>62,7                 | 7,3<br>7,5               | 50<br>50             | 80<br>80                       | 5,1<br>4,8           | 4,5<br>3,8           | NR<br>NR             | NR<br>NR                    | NR<br>NR             | NR<br>NR                     | 27,8<br>28,5             | 4,4<br>4,7           | NR<br>NR             | NR<br>NR             | 0<br>0               | 84<br>88             | 77<br>72             | 0<br>0         |        |
| 31  | Lundsgaard     | 2008                | RCT             | 251                 | Hyalgan Placebo I/A 20 mL Placebo I/A 2 mL              | 84<br>83<br>84       | 48<br>46<br>44      | 36<br>37<br>40       | 68,8<br>69,8<br>69,6         | 6,3<br>6,8<br>7,3        | 59<br>59<br>59       | NR<br>NR<br>NR                 | 7,8<br>7,0<br>8,3    | 7,1<br>8,5<br>7,2    | NR<br>NR<br>NR       | NR<br>NR<br>NR              | NR<br>NR<br>NR       | NR<br>NR<br>NR               | 29,6<br>29,2<br>29,3     | 4,3<br>4,9<br>4,3    | NR<br>NR<br>NR       | NR<br>NR<br>NR       | 9<br>11<br>9         | 13<br>11<br>10       | 31<br>34<br>30       | 31<br>27<br>31 |        |
| 32  | Jüni           | 2007                | RCT             | 660                 | Synvisc Orthovisc Ostenil                               | 222<br>219<br>219    | 144<br>150<br>143   | 78<br>69<br>76       | 63,3<br>63,5<br>63,3         | 12,3<br>11,1<br>11,5     | NR<br>NR<br>NR       | NR<br>NR<br>NR                 | NR<br>NR<br>NR       | NR<br>NR<br>NR       | NR<br>NR<br>NR       | NR<br>NR<br>NR              | NR<br>NR<br>NR       | NR<br>NR<br>NR               | 28,2<br>28,1<br>28,6     | 4,9<br>5,0<br>5,2    | NR<br>NR<br>NR       | NR<br>NR<br>NR       | 0<br>0<br>0          | 53<br>44<br>48       | 126<br>127<br>131    | 43<br>48<br>40 |        |
| 33  | Mazières       | 2007                | Medico-economic | 296                 | Suplasyn                                                | 296                  | 192                 | 104                  | 69,0                         | 10,0                     | 36                   | 88                             | 4,8                  | 5,3                  | NR                   | NR                          | NR                   | NR                           | 28,0                     | 5,0                  | NR                   | NR                   | 35                   | 96                   | 119                  | 46             |        |
| 34  | Petrella       | 2006                | RCT             | 105                 | Suplasyn IA Placebo                                     | 51<br>54             | 22<br>25            | 29<br>29             | 63,9<br>62,4                 | 9,3<br>10,3              | 40<br>38             | 83<br>85                       | NR<br>NR             | NR<br>NR             | NR<br>NR             | NR<br>NR                    | NR<br>NR             | NR<br>NR                     | 29,9<br>31,0             | 5,7<br>5,3           | NR<br>NR             | NR<br>NR             | 5<br>8               | 35<br>30             | 11<br>16             | 0<br>0         |        |
| 35  | Lee            | 2006                | RCT             | 146                 | Hytuan-Plus Hyal                                        | 75<br>71             | 70<br>67            | 5<br>4               | 59,6<br>61,1                 | 8,8<br>7,4               | 40<br>40             | NR<br>NR                       | 4,3<br>4,7           | 3,2<br>3,3           | NR<br>NR             | NR<br>NR                    | NR<br>NR             | NR<br>NR                     | 26,0<br>26,0             | 3,0<br>3,0           | NR<br>NR             | NR<br>NR             | NR<br>NR             | NR<br>NR             | NR<br>NR             | NR<br>NR       |        |
| 36  | Arensi         | 2006                | RCT             | 40                  | Go-On Hyalgan                                           | 20<br>20             | 14<br>16            | 6<br>4               | 65,4<br>62,6                 | 10,9<br>12,2             | 40<br>40             | NR<br>NR                       | 6,6<br>5,3           | 4,8<br>4,1           | NR<br>NR             | NR<br>NR                    | NR<br>NR             | NR<br>NR                     | 27,3<br>26,8             | 2,9<br>5,5           | NR<br>NR             | NR<br>NR             | NR<br>NR             | NR<br>NR             | NR<br>NR             | NR<br>NR       |        |
| 37  | Neustadt       | 2005                | RCT             | 336                 | Orthovisc - 4 inj Orthovisc - 3 inj IA Placebo          | 115<br>107<br>114    | 52<br>52<br>57      | 63<br>55<br>57       | 58,4<br>58,9<br>59,1         | 8,9<br>8,9<br>8,3        | 40<br>40<br>40       | NR<br>NR<br>NR                 | NR<br>NR<br>NR       | NR<br>NR<br>NR       | NR<br>NR<br>NR       | NR<br>NR<br>NR              | NR<br>NR<br>NR       | NR<br>NR<br>NR               | 28,9<br>29,6<br>29,4     | 4,2<br>4,3<br>4,2    | NR<br>NR<br>NR       | NR<br>NR<br>NR       | 11<br>17<br>14       | 56<br>58<br>53       | 48<br>32<br>47       | 0<br>0<br>0    |        |
| 38  | Altman         | 2004                | RCT             | 346                 | Durolane IA Placebo                                     | 172<br>174           | 79<br>111           | 93<br>63             | 62,9<br>63,3                 | NR<br>NR                 | 41<br>35             | 85<br>85                       | 5,0<br>6,5           | NR<br>NR             | 0,0<br>0,0           | 45,5<br>50,5                | 63<br>57             | 36,6%<br>32,8%               | 30,3<br>29,5             | NR<br>NR             | 18,4<br>18,4         | 61,1<br>54,6         | 0<br>0               | 40<br>39             | 92<br>90             | 40<br>45       |        |
| 39  | Petrella       | 2002                | RCT             | 108                 | Suplasyn Suplasyn & NSAID IA Placebo & NSAID IA Placebo | 25<br>29<br>26<br>28 | 9<br>13<br>11<br>12 | 16<br>16<br>15<br>16 | 67,3<br>65,0<br>66,3<br>62,6 | 8,9<br>9,7<br>8,8<br>9,5 | NR<br>NR<br>NR<br>NR | NR<br>NR<br>NR<br>NR           | NR<br>NR<br>NR<br>NR | NR<br>NR<br>NR<br>NR | NR<br>NR<br>NR<br>NR | NR<br>NR<br>NR<br>NR        | NR<br>NR<br>NR<br>NR | 29,5<br>31,6<br>29,4<br>32,7 | 4,2<br>6,3<br>6,3<br>4,8 | NR<br>NR<br>NR<br>NR | NR<br>NR<br>NR<br>NR | NR<br>NR<br>NR<br>NR | NR<br>NR<br>NR<br>NR | NR<br>NR<br>NR<br>NR | NR<br>NR<br>NR<br>NR |                |        |
| 40  | Brandt         | 2001                | RCT             | 226                 | Orthovisc IA Placebo                                    | 114<br>112           | 72<br>71            | 42<br>41             | 65,0<br>67,0                 | 8,4<br>8,4               | 50<br>50             | NR<br>NR                       | NR<br>NR             | NR<br>NR             | NR<br>NR             | NR<br>NR                    | NR<br>NR             | NR<br>NR                     | 32,0<br>30,1             | 6,0<br>6,2           | NR<br>NR             | NR<br>NR             | 0<br>0               | NR<br>NR             | NR<br>NR             | NR<br>NR       |        |
| 41  | Takamura       | 2019                | RCT             | 311                 | Gel-200 IA Placebo                                      | 152<br>159           | 88<br>99            | 64<br>60             | 61,0<br>62,8                 | 9,4<br>8,9               | NR<br>NR             | NR<br>NR                       | 7,4<br>7,8           | 6,8<br>6,1           | NR<br>NR             | NR<br>NR                    | NR<br>NR             | NR<br>NR                     | NR<br>NR                 | NR<br>NR             | NR<br>NR             | NR<br>NR             | NR<br>NR             | 0<br>0               | 85<br>92             | 67<br>67       | 0<br>0 |
| 42  | Tuan           | 2018                | Observational   | 46                  | Hyajoint Plus                                           | 46                   | 37                  | 9                    | 65,1                         | 9,3                      | 40                   | 85                             | 5,4                  | 5,6                  | NR                   | NR                          | NR                   | NR                           | 24,0                     | 3,7                  | NR                   | NR                   | 0                    | 27                   | 19                   | 0              |        |
| 43  | Ha             | 2017                | RCT             | 283                 | Hyruan One Hyruan Plus                                  | 137<br>146           | 111<br>114          | 26<br>32             | 62,4<br>62,0                 | 8,4<br>8,6               | 40<br>40             | NR<br>NR                       | 3,0<br>3,4           | NR<br>NR             | 0,1<br>1,0           | 26,0<br>24,1                | NR<br>NR             | NR<br>NR                     | 24,8<br>25,1             | 2,7<br>2,9           | NR<br>NR             | NR<br>NR             | 28<br>19             | 65<br>59             | 53<br>59             | 0<br>0         |        |
| 44  | Sun            | 2017                | RCT             | 121                 | Hyajoint Plus Synvisc-One                               | 62<br>59             | 48<br>42            | 14<br>17             | 62,7<br>62,5                 | 8,4<br>10,0              | 40<br>40             | 85<br>85                       | 5,4<br>5,2           | 4,4<br>4,6           | NR<br>NR             | NR<br>NR                    | NR<br>NR             | NR<br>NR                     | 24,7<br>25,2             | 3,3<br>4,2           | NR<br>NR             | NR<br>NR             | 0<br>0               | 40<br>39             | 22<br>20             | 0<br>0         |        |
| 45  | Conrozier      | 2016                | Observational   | 40                  | HappyCross                                              | 40                   | 27                  | 13                   | 60,7                         | 13,9                     | 37                   | 79                             | 3,7                  | 1,5                  | 0,3                  | 16,7                        | NR                   | NR                           | 28,6                     | 5,0                  | 19,5                 | 38,6                 | 2                    | 11                   | 17                   | 10             |        |
| 46  | Kearey         | 2017                | Observational   | 119                 | Synvisc-One                                             | 119                  | 79                  | 40                   | 60,2                         | 11,3                     | 30                   | 90                             | 5,3                  | 6,3                  | NR                   | NR                          | NR                   | NR                           | 30,9                     | 6,4                  | NR                   | NR                   | 5                    | 45                   | 65                   | 0              |        |
| 47  | Pal            | 2014                | Observational   | 394                 | Synvisc-One                                             | 394                  | 285                 | 109                  | 57,6                         | 9,8                      | 30                   | NR                             | 1,4                  | 2,8                  | NR                   | NR                          | NR                   | NR                           | 27,7                     | 4,5                  | NR                   | NR                   | 20                   | 151                  | 223                  | 0              |        |
| 48  | Borras-Verdera | 2012                | Observational   | 79                  | Ostenil Plus                                            | NR                   | NR                  | NR                   | NR                           | NR                       | 40                   | NR                             | NR                   | NR                   | NR                   | NR                          | NR                   | NR                           | NR                       | NR                   | NR                   | NR                   | 0                    | 0                    | 79                   | 0              |        |
| 49  | Chevalier      | 2010                | RCT             | 253                 | Synvisc IA Placebo                                      | 124<br>129           | 92<br>88            | 32<br>41             | 63,6<br>62,5                 | 9,6<br>9,2               | 40<br>40             | NR<br>NR                       | 6,4<br>5,8           | 6,4<br>5,4           | 0,3<br>0,3           | 29,2<br>20,2                | 26<br>28             | 21,0%<br>21,7%               | 29,1<br>29,8             | 4,8<br>5,7           | NR<br>NR             | NR<br>NR             | 0<br>0               | 63<br>51             | 60<br>78             | 1<br>0         |        |
| 50  | Çubukçu        | 2005                | RCT             | 30                  | Synvisc IA Placebo                                      | 20<br>10             | 14<br>10            | 6<br>0               | 52,6<br>57,6                 | 7,2<br>2,8               | NR<br>NR             | NR<br>NR                       | 2,7<br>1,8           | 0,8<br>0,6           | NR<br>NR             | NR<br>NR                    | NR<br>NR             | NR<br>NR                     | 28,6<br>26,8             | 4,4<br>3,8           | NR<br>NR             | NR<br>NR             | NR<br>NR             | NR<br>NR             | NR<br>NR             | NR<br>NR       |        |
| 51  | Day            | 2004                | RCT             | 240                 | Artz IA Placebo                                         | 116<br>124           | 65<br>76            | 51<br>48             | 62,0<br>62,0                 | NR<br>NR                 |                      |                                |                      |                      |                      |                             |                      |                              |                          |                      |                      |                      |                      |                      |                      |                |        |

| Ref          | Main author    | Year of publication | Study design    | Analyzed population | Equivalents                     | Profiled population        |                             |                             | Age                  |                      |                |                | Anteriority of knee OA (years) |                |                |                | Lower limb surgical history |                | BMI                  |                   |                |                | Radiological grade        |                             |                             |                           |        |
|--------------|----------------|---------------------|-----------------|---------------------|---------------------------------|----------------------------|-----------------------------|-----------------------------|----------------------|----------------------|----------------|----------------|--------------------------------|----------------|----------------|----------------|-----------------------------|----------------|----------------------|-------------------|----------------|----------------|---------------------------|-----------------------------|-----------------------------|---------------------------|--------|
|              |                |                     |                 |                     |                                 | per group                  | Women                       | Men                         | mean                 | SD                   | mini           | maxi           | mean                           | SD             | mini           | maxi           | declared                    | %              | mean                 | SD                | mini           | maxi           | KL I                      | KL II                       | KL III                      | KL IV                     |        |
| 13           | Petterson      | 2019                | RCT             | 184                 | Monovisc                        | 184                        | 109                         | 75                          | 59,5                 | 8,0                  | 35             | 75             | NR                             | NR             | NR             | NR             | NR                          | NR             | 29,9                 | 4,3               | NR             | NR             | 0                         | 105                         | 79                          | 0                         |        |
| 14           | Maheu          | 2019                | RCT             | 292                 | Ostenil Plus<br>Synvisc-One     | 144<br>148                 | 104<br>90                   | 40<br>58                    | 67,1<br>66,6         | 9,7<br>10,7          | 40<br>40       | 85<br>85       | 6,9<br>7,4                     | 5,3<br>5,3     | NR<br>NR       | NR<br>NR       | NR<br>NR                    | NR             | 26,4<br>26,3         | 3,0<br>2,9        | NR<br>NR       | NR<br>NR       | 21<br>26                  | 78<br>87                    | 45<br>35                    | 0<br>0                    |        |
| 15           | Diraçoğlu      | 2016                | RCT             | 40                  | Monovisc<br>Adant               | 20<br>20                   | 16<br>17                    | 4<br>3                      | 58,0<br>56,4         | 7,0<br>5,7           | 45<br>45       | 70<br>70       | NR<br>NR                       | NR<br>NR       | NR<br>NR       | NR<br>NR       | NR                          | NR             | 30,5<br>30,8         | 4,9<br>3,3        | NR<br>NR       | NR<br>NR       | 0<br>0                    | NR<br>NR                    | NR<br>NR                    | 0<br>0                    |        |
| 16           | Saccomanno     | 2016                | RCT             | 53                  | Orthovisc                       | 53                         | 42                          | 11                          | 62,8                 | 13,2                 | NR             | NR             | NR                             | NR             | NR             | NR             | NR                          | 10             | 18,9%                | 27,5              | 3,0            | NR             | NR                        | 34                          | 8                           | 11                        | 0      |
| 17           | Tammachote     | 2016                | RCT             | 50                  | Synvisc-One                     | 50                         | 43                          | 7                           | 62,6                 | NR                   | 46             | 77             | NR                             | NR             | NR             | NR             | NR                          | NR             | 26,3                 | NR                | NR             | NR             | 10                        | 11                          | 22                          | 7                         |        |
| 18           | Van der Weegen | 2015                | RCT             | 99                  | Fermathron Plus                 | 99                         | 50                          | 49                          | 58,7                 | 9,6                  | NR             | NR             | 5,3                            | 7,5            | NR             | NR             | NR                          | NR             | 28,6                 | 5,2               | NR             | NR             | 32                        | 53                          | 14                          | 0                         |        |
| 19           | Davallilo      | 2015                | RCT             | 97                  | Suprahyal                       | 97                         | 59                          | 38                          | 62,7                 | 0,6                  | 40             | 85             | NR                             | NR             | NR             | NR             | NR                          | NR             | 28,3                 | 0,5               | NR             | NR             | 0                         | 62                          | 35                          | 0                         |        |
| 20           | Zhang          | 2015                | RCT             | 319                 | Artz<br>Durolane                | 158<br>161                 | 127<br>119                  | 31<br>42                    | 60,4<br>60,2         | 7,8<br>8,1           | 42<br>40       | 78<br>78       | 4,0<br>3,9                     | 4,8<br>5,3     | NR<br>NR       | NR<br>NR       | NR                          | 8<br>4         | 5,1%<br>2,5%         | NR<br>NR          | NR<br>NR       | NR<br>NR       | NR<br>NR                  | 0<br>0                      | 95<br>94                    | 63<br>67                  | 0<br>0 |
| 21           | Leighton       | 2014                | RCT             | 218                 | Durolane                        | 218                        | 111                         | 107                         | 61,9                 | 9,6                  | 35             | 80             | 4,7                            | 5,4            | NR             | NR             | 74                          | 33,9%          | 28,2                 | 4,2               | NR             | NR             | 0                         | 71                          | 147                         | 0                         |        |
| 22           | Arden          | 2014                | RCT             | 108                 | Durolane                        | 108                        | 59                          | 49                          | 64,5                 | NR                   | 29             | 84             | 2,2                            | NR             | 0,0            | 21,2           | 46                          | 42,6%          | 27,2                 | NR                | 20,3           | 39,7           | 0                         | 33                          | 75                          | 0                         |        |
| 23           | Berenbaum      | 2012                | RCT             | 426                 | Go-On<br>Hyalgan                | 217<br>209                 | 135<br>134                  | 82<br>75                    | 67,2<br>66,1         | 7,8<br>8,1           | 50<br>50       | 80<br>80       | NR<br>NR                       | NR<br>NR       | NR<br>NR       | NR<br>NR       | NR                          | NR             | 28,0<br>27,7         | 3,0<br>3,1        | NR<br>NR       | NR<br>NR       | 0<br>0                    | 101<br>113                  | 116<br>96                   | 0<br>0                    |        |
| 24           | Strand         | 2012                | RCT             | 247                 | Gel-200                         | 247                        | 147                         | 100                         | 60,9                 | 10,2                 | 40             | 80             | 3,5                            | 4,3            | NR             | NR             | NR                          | NR             | 28,3                 | 4,1               | NR             | NR             | 21                        | 94                          | 132                         | 0                         |        |
| 25           | DeCaria        | 2012                | RCT             | 15                  | Hyalgan                         | 15                         | 7                           | 8                           | 71,9                 | 6,8                  | NR             | NR             | NR                             | NR             | NR             | NR             | NR                          | NR             | 30,5                 | 6,2               | NR             | NR             | 0                         | NR                          | NR                          | 0                         |        |
| 26           | Kawasaki       | 2009                | RCT             | 42                  | Artz                            | 42                         | 42                          | 0                           | 69,5                 | 8,4                  | NR             | NR             | NR                             | NR             | NR             | NR             | NR                          | NR             | 25,7                 | 4,1               | NR             | NR             | NR                        | NR                          | NR                          | NR                        |        |
| 27           | Pavelka        | 2011                | RCT             | 380                 | Sinovial<br>Synvisc             | 192<br>188                 | 139<br>138                  | 53<br>50                    | 65,1<br>64,9         | 9,1<br>8,7           | 40<br>40       | 81<br>81       | 6,3<br>5,6                     | 5,8<br>5,6     | NR<br>NR       | NR<br>NR       | 24<br>25                    | 12,5%<br>13,3% | 27,1<br>27,0         | 3,1<br>3,1        | NR<br>NR       | NR<br>NR       | 0<br>0                    | 85<br>85                    | 107<br>103                  | 0<br>0                    |        |
| 28           | Huang          | 2011                | RCT             | 100                 | Hyalgan                         | 100                        | 74                          | 26                          | 65,9                 | 8,1                  | 50             | NR             | 1,4                            | 3,3            | NR             | NR             | NR                          | NR             | 25,7                 | 4,3               | NR             | NR             | 0                         | 59                          | 41                          | 0                         |        |
| 29           | Diraçoğlu      | 2009                | RCT             | 40                  | Synvisc                         | 40                         | 36                          | 4                           | 59,4                 | 9,9                  | NR             | NR             | NR                             | NR             | NR             | NR             | NR                          | NR             | 31,1                 | 5,0               | NR             | NR             | 0                         | NR                          | NR                          | 0                         |        |
| 30           | Onel           | 2008                | RCT             | 321                 | Synvisc<br>Euflexxa             | 161<br>160                 | 108<br>99                   | 53<br>61                    | 63,7<br>62,7         | 7,3<br>7,5           | 50<br>50       | 80<br>80       | 5,1<br>4,8                     | 4,5<br>3,8     | NR<br>NR       | NR<br>NR       | NR<br>NR                    | NR             | 27,8<br>28,5         | 4,4<br>4,7        | NR<br>NR       | NR<br>NR       | 0<br>0                    | 84<br>88                    | 77<br>72                    | 0<br>0                    |        |
| 31           | Lundsgaard     | 2008                | RCT             | 84                  | Hyalgan                         | 84                         | 48                          | 36                          | 68,8                 | 6,3                  | 59             | NR             | 7,8                            | 7,1            | NR             | NR             | NR                          | NR             | 29,6                 | 4,3               | NR             | NR             | 9                         | 13                          | 31                          | 31                        |        |
| 32           | Jüni           | 2007                | RCT             | 660                 | Synvisc<br>Orthovisc<br>Ostenil | 222<br>219<br>219          | 144<br>150<br>143           | 78<br>69<br>76              | 63,3<br>63,5<br>63,3 | 12,3<br>11,1<br>11,5 | NR<br>NR<br>NR | NR<br>NR<br>NR | NR<br>NR<br>NR                 | NR<br>NR<br>NR | NR<br>NR<br>NR | NR<br>NR<br>NR | NR                          | NR             | 28,2<br>28,1<br>28,6 | 4,9<br>5,0<br>5,2 | NR<br>NR<br>NR | NR<br>NR<br>NR | 0<br>0<br>0               | 53<br>44<br>48              | 126<br>127<br>131           | 43<br>48<br>40            |        |
| 33           | Mazières       | 2007                | Medico-economic | 296                 | Suplasyn                        | 296                        | 192                         | 104                         | 69,0                 | 10,0                 | 36             | 88             | 4,8                            | 5,3            | NR             | NR             | NR                          | NR             | 28,0                 | 5,0               | NR             | NR             | 35                        | 96                          | 119                         | 46                        |        |
| 34           | Petrella       | 2006                | RCT             | 51                  | Suplasyn                        | 51                         | 22                          | 29                          | 63,9                 | 9,3                  | 40             | 83             | NR                             | NR             | NR             | NR             | NR                          | NR             | 29,9                 | 5,7               | NR             | NR             | 5                         | 35                          | 11                          | 0                         |        |
| 35           | Lee            | 2006                | RCT             | 146                 | Hytuan-Plus<br>Hyal             | 75<br>71                   | 70<br>67                    | 5<br>4                      | 59,6<br>61,1         | 8,8<br>7,4           | 40<br>40       | NR<br>NR       | 4,3<br>4,7                     | 3,2<br>3,3     | NR<br>NR       | NR<br>NR       | NR<br>NR                    | NR             | 26,0<br>26,0         | 3,0<br>3,0        | NR<br>NR       | NR<br>NR       | NR<br>NR                  | NR<br>NR                    | NR<br>NR                    | NR<br>NR                  |        |
| 36           | Arensi         | 2006                | RCT             | 40                  | Go-On<br>Hyalgan                | 20<br>20                   | 14<br>16                    | 6<br>4                      | 65,4<br>62,6         | 10,9<br>12,2         | 40<br>40       | NR<br>NR       | 6,6<br>5,3                     | 4,8<br>4,1     | NR<br>NR       | NR<br>NR       | NR<br>NR                    | NR             | 27,3<br>26,8         | 2,9<br>5,5        | NR<br>NR       | NR<br>NR       | NR<br>NR                  | NR<br>NR                    | NR<br>NR                    | NR<br>NR                  |        |
| 37           | Neustadt       | 2005                | RCT             | 107                 | Orthovisc - 3 inj               | 107                        | 52                          | 55                          | 58,9                 | 8,9                  | 40             | NR             | NR                             | NR             | NR             | NR             | NR                          | NR             | 29,6                 | 4,3               | NR             | NR             | 17                        | 58                          | 32                          | 0                         |        |
| 38           | Altman         | 2004                | RCT             | 172                 | Durolane                        | 172                        | 79                          | 93                          | 62,9                 | NR                   | 41             | 85             | 5,0                            | NR             | 0,0            | 45,5           | 63                          | 36,6%          | 30,3                 | NR                | 21,4           | 61,1           | 0                         | 40                          | 92                          | 40                        |        |
| 39           | Petrella       | 2002                | RCT             | 25                  | Suplasyn                        | 25                         | 9                           | 16                          | 67,3                 | 8,9                  | NR             | NR             | NR                             | NR             | NR             | NR             | NR                          | NR             | 29,5                 | 4,2               | NR             | NR             | NR                        | NR                          | NR                          | 0                         |        |
| 40           | Brandt         | 2001                | RCT             | 114                 | Orthovisc                       | 114                        | 72                          | 42                          | 65,0                 | 8,4                  | 50             | NR             | NR                             | NR             | NR             | NR             | NR                          | NR             | 32,0                 | 6,0               | NR             | NR             | 0                         | NR                          | NR                          | 0                         |        |
| 41           | Takamura       | 2019                | RCT             | 152                 | Gel-200                         | 152                        | 88                          | 64                          | 61,0                 | 9,4                  | NR             | NR             | 7,4                            | 6,8            | NR             | NR             | NR                          | NR             | NR                   | NR                | NR             | NR             | 0                         | 85                          | 67                          | 0                         |        |
| 42           | Tuan           | 2018                | Observational   | 46                  | Hyajoint Plus                   | 46                         | 37                          | 9                           | 65,1                 | 9,3                  | 40             | 85             | 5,4                            | 5,6            | NR             | NR             | NR                          | NR             | 24,0                 | 3,7               | NR             | NR             | 0                         | 27                          | 19                          | 0                         |        |
| 43           | Ha             | 2017                | RCT             | 283                 | Hyruan One<br>Hyruan Plus       | 137<br>146                 | 111<br>114                  | 26<br>32                    | 62,4<br>62,0         | 8,4<br>8,6           | 40<br>40       | NR<br>NR       | 3,0<br>3,4                     | NR<br>NR       | 0,1<br>1,0     | 26,0<br>24,1   | NR<br>NR                    | NR             | 24,8<br>25,1         | 2,7<br>2,9        | NR<br>NR       | NR<br>NR       | 28<br>19                  | 65<br>59                    | 53<br>59                    | 0<br>0                    |        |
| 44           | Sun            | 2017                | RCT             | 121                 | Hyajoint Plus<br>Synvisc-One    | 62<br>59                   | 48<br>42                    | 14<br>17                    | 62,7<br>62,5         | 8,4<br>10,0          | 40<br>40       | 85<br>85       | 5,4<br>5,2                     | 4,4<br>4,6     | NR<br>NR       | NR<br>NR       | NR<br>NR                    | NR             | 24,7<br>25,2         | 3,3<br>4,2        | NR<br>NR       | NR<br>NR       | 0<br>0                    | 40<br>39                    | 22<br>20                    | 0<br>0                    |        |
| 45           | Conrozier      | 2016                | Observational   | 40                  | HappyCross                      | 40                         | 27                          | 13                          | 60,7                 | 13,9                 | 37             | 79             | 3,7                            | 1,5            | 0,3            | 16,7           | NR                          | NR             | 28,6                 | 5,0               | 19,5           | 38,6           | 2                         | 11                          | 17                          | 10                        |        |
| 46           | Kearey         | 2017                | Observational   | 119                 | Synvisc-One                     | 119                        | 79                          | 40                          | 60,2                 | 11,3                 | 30             | 90             | 5,3                            | 6,3            | NR             | NR             | NR                          | NR             | 30,9                 | 6,4               | NR             | NR             | 5                         | 45                          | 65                          | 0                         |        |
| 47           | Pal            | 2014                | Observational   | 394                 | Synvisc-One                     | 394                        | 285                         | 109                         | 57,6                 | 9,8                  | 30             | NR             | 1,4                            | 2,8            | NR             | NR             | NR                          | NR             | 27,7                 | 4,5               | NR             | NR             | 20                        | 151                         | 223                         | 0                         |        |
| 48           | Borras-Verdera | 2012                | Observational   | 79                  | Ostenil Plus                    | NR                         | NR                          | NR                          | NR                   | NR                   | 40             | NR             | NR                             | NR             | NR             | NR             | NR                          | NR             | NR                   | NR                | NR             | NR             | 0                         | 0                           | 79                          | 0                         |        |
| 49           | Chevalier      | 2010                | RCT             | 124                 | Synvisc                         | 124                        | 92                          | 32                          | 63,6                 | 9,6                  | 40             | NR             | 6,4                            | 6,4            | 0,3            | 29,2           | 26                          | 21,0%          | 29,1                 | 4,8               | NR             | NR             | 0                         | 63                          | 60                          | 1                         |        |
| 50           | Çubukçu        | 2005                | RCT             | 20                  | Synvisc                         | 20                         | 14                          | 6                           | 52,6                 | 7,2                  | NR             | NR             | 2,7                            | 0,8            | NR             | NR             | NR                          | NR             | 28,6                 | 4,4               | NR             | NR             | NR                        | NR                          | NR                          | NR                        |        |
| 51           | Day            | 2004                | RCT             | 116                 | Artz                            | 116                        | 65                          | 51                          | 62,0                 | NR                   | 39             | 79             | 6,0                            | 3,8            | NR             | NR             | NR                          | NR             | 29,8                 | NR                | NR             | NR             | NR                        | NR                          | NR                          | NR                        |        |
| 52           | Karlsson       | 2002                | RCT             | 180                 | Artzal<br>Synvisc               | 92<br>88                   | 62<br>57                    | 30<br>31                    | 72,0<br>70,0         | 7,0<br>7,0           | 60<br>60       | NR<br>NR       | NR<br>NR                       | NR<br>NR       | NR<br>NR       | NR<br>NR       | NR                          | NR             | 28,4<br>27,7         | 4,6<br>4,6        | NR<br>NR       | NR<br>NR       | 0<br>0                    | 0<br>0                      | 28<br>27                    | 64<br>61                  |        |
| 57           | Germonville    | 2015                | RCT             | 122                 | Hyalgan                         | 122                        | 83                          | 39                          | 64,8                 | 10,9                 | 36             | 87             | 3,7                            | 3,6            | 0,1            | 15,0           | 27                          | 22,1%          | 27,9                 | 5,1               | 19,8           | 49,5           | 24                        | 39                          | 51                          | 5                         |        |
| 61           | Maheu          | 2011                | RCT             | 236                 | Structovial<br>Synvisc          | 119<br>117                 | 87<br>93                    | 32<br>24                    | 64,5<br>63,0         | 7,1<br>6,6           | 49<br>50       | 77<br>75       | 6,2<br>5,6                     | 6,0<br>4,6     | NR<br>NR       | NR<br>NR       | NR<br>NR                    | NR             | 29,8<br>29,9         | 5,0<br>4,8        | 20,1<br>18,0   | 44,7<br>51,1   | 0<br>0                    | 68<br>71                    | 51<br>46                    | 0<br>0                    |        |
| 62           | Altman         | 2009                | RCT             | 291                 | Euflexxa                        | 291                        | 184                         | 107                         | 62,5                 | 11,0                 | NR             | NR             | NR                             | NR             | NR             | NR             | NR                          | NR             | 32,4                 | 7,0               | NR             | NR             | 0                         | 119                         | 172                         | 0                         |        |
| <b>Total</b> |                |                     |                 |                     |                                 | <b>6970</b><br><b>6970</b> | <b>4651</b><br><b>66,7%</b> | <b>2319</b><br><b>33,3%</b> | <b>63,3</b>          | <b>8,9</b>           | <b>29</b>      | <b>90</b>      | <b>4,9</b>                     | <b>4,7</b>     | <b>0,0</b>     | <b>45,5</b>    | <b>307</b><br><b>1496</b>   | <b>20,5%</b>   | <b>28,1</b>          | <b>4,2</b>        | <b>18,0</b>    | <b>61,1</b>    | <b>308</b><br><b>4,8%</b> | <b>2675</b><br><b>41,5%</b> | <b>3065</b><br><b>47,6%</b> | <b>396</b><br><b>6,1%</b> |        |

Removed before analysis per group:

| Ref                  | Author     | Year | Candidate group | Patients   | Active principle   | Reason                    |
|----------------------|------------|------|-----------------|------------|--------------------|---------------------------|
| 16                   | Saccomanno | 2016 | Equivalents     | 53         | Orthovisc + EBR    | Combination of treatments |
| 17                   | Tammachote | 2016 | Controls        | 49         | Triamsinolone      | I/A corticoid             |
| 19                   | Davallilo  | 2015 | Controls        | 98         | Betamethasone      | I/A corticoid             |
| 21                   | Leighton   | 2014 | Controls        | 215        | Methylprednisolone | I/A corticoid             |
| 37                   | Neustadt   | 2005 | Equivalents     | 115        | Orthovisc - 4 inj  | Off-label treatment       |
| 39                   | Petrella   | 2002 | Equivalents     | 29         | Suplasyn & NSAID   | Combination of treatments |
| 39                   | Petrella   | 2002 | Controls        | 26         | IA Placebo & NSAID | Combination of treatments |
| <b>Total removed</b> |            |      |                 | <b>585</b> |                    |                           |
